# Supplementary material for: A simple and sensitive graphene oxide/gold nanoparticle surface plasmon resonance Rayleigh scattering-energy transfer analytical platform for detection of iodide and H2O2
Source: Royal Society of Chemistry journal article supplement (doi:10.1039/c4ra12685h), 2014-12-24
Supplement: c4ra12685h1.pdf [file c4ra12685h1.pdf]

**A simple and sensitive graphene oxide/nanogold SPR Rayleigh scattering-energy transfer analytical platform for detection of iodide and H<sub>2</sub>O<sub>2</sub>**

Yaohui Wang, Xinghui Zhang, Qingye Liu, Guiqing Wen, Aihui Liang\*, Zhiliang Jiang\*

(Key Laboratory of Ecology of Rare and Endangered Species and Environmental Protection of Ministry Education, Guangxi Key Laboratory of Environmental Pollution Control Theory and Technology, Guangxi Normal University, Guilin 541004, China.)

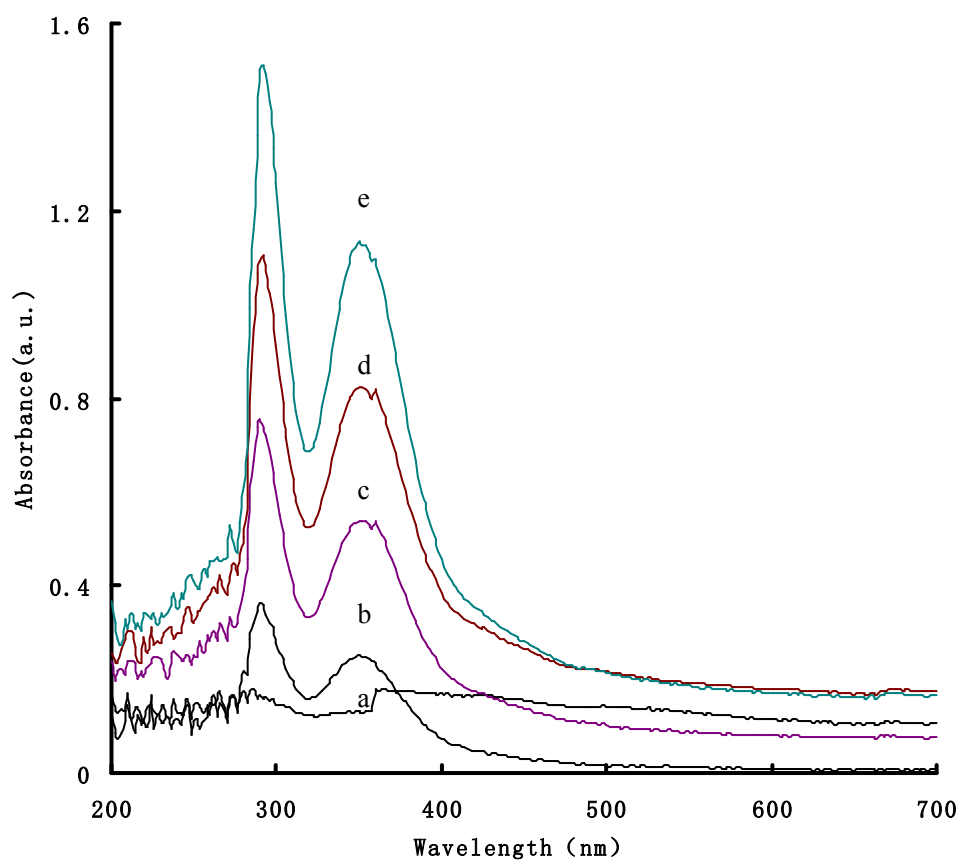

Fig. 1S Absorption spectra of the GO/GN-KI-KIO<sub>3</sub> system  
(a) pH 2.8 Na<sub>2</sub>HPO<sub>4</sub>-citric acid-4mmol/LKI-4.78μg/mL GO/GN; (b) a+5μmol/L KIO<sub>3</sub>; (c) a+10μmol/L KIO<sub>3</sub>; (d) a+20μmol/L KIO<sub>3</sub>; (e) a+25 μmol/L KIO<sub>3</sub>.

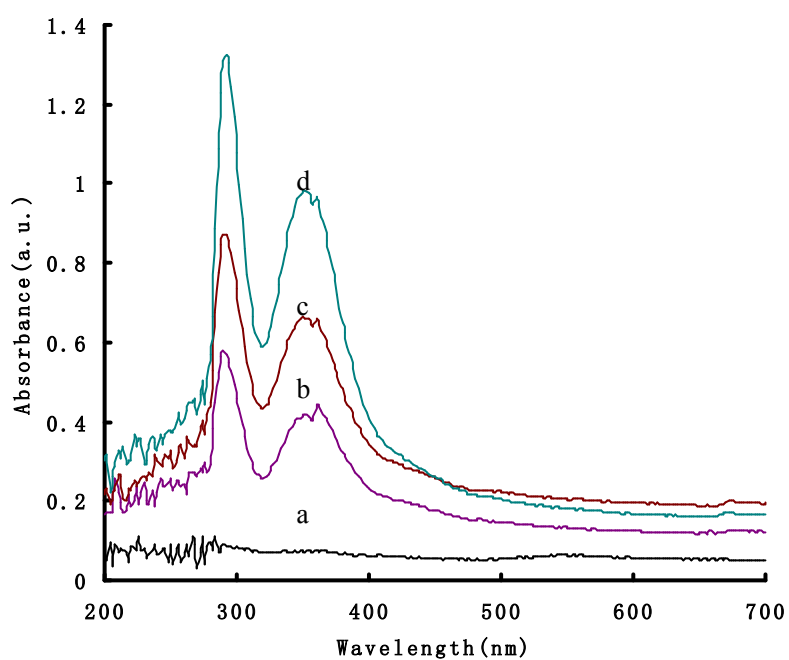

**Fig. 2S** Absorption spectra of the GN-KI-KIO<sub>3</sub> system  
 (a) pH 2.8 Na<sub>2</sub>HPO<sub>4</sub>- citric acid-4mmol/L KI-4.782μg/ml GN; (b) a+15μmol/L KIO<sub>3</sub>;  
 (c) a+20μmol/L KIO<sub>3</sub>; (d) a+25μmol/L KIO<sub>3</sub>.

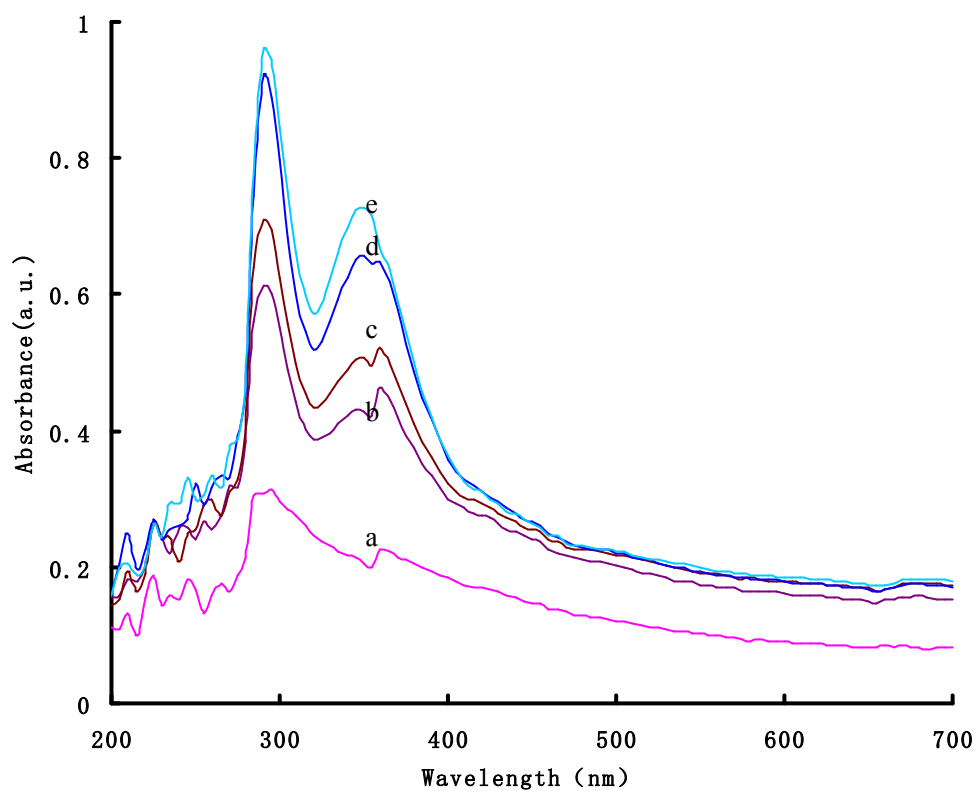

**Fig. 3S** Absorption spectra of the GO-KI-KIO<sub>3</sub> system

(a) pH 2.8  $\text{Na}_2\text{HPO}_4$ -citric acid-4mmol/L KI-15 $\mu\text{g/L}$  GO; (b) a+5.5 $\mu\text{mol/L}$   $\text{KIO}_3$ ;  
 (c) a+7 $\mu\text{mol/L}$   $\text{KIO}_3$ ; (d) a+8.5 $\mu\text{mol/L}$   $\text{KIO}_3$ ; (e) a+10 $\mu\text{mol/L}$   $\text{KIO}_3$ .

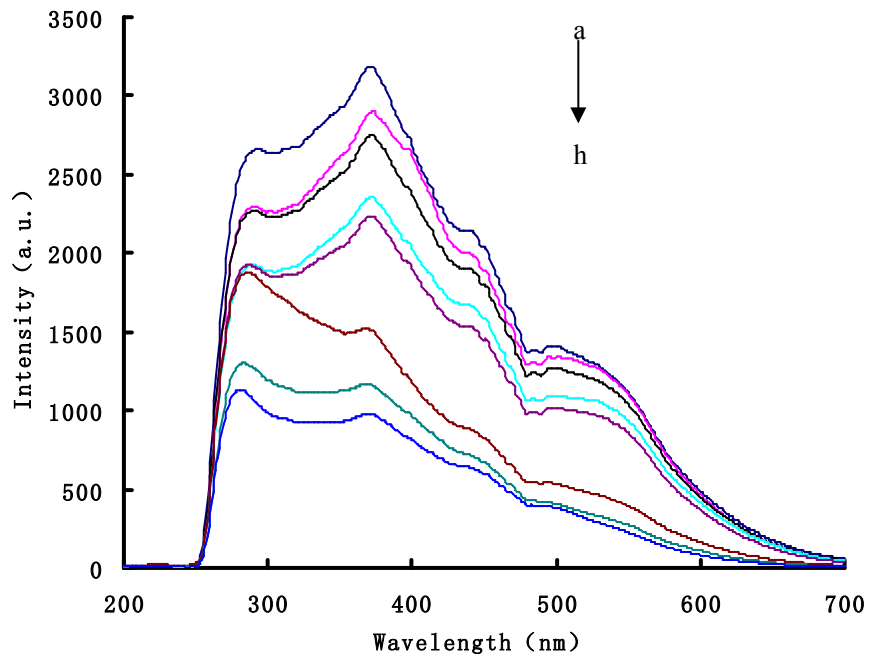

**Fig. 4S RRS spectra of the GN-KI-KIO<sub>3</sub> system**

(a) pH 2.8  $\text{Na}_2\text{HPO}_4$ - citric acid-4mmol/L KI-4.782 $\mu\text{g/ml}$  GN; (b) a+0.25 $\mu\text{mol/L}$   $\text{KIO}_3$ ; (c) a+1 $\mu\text{mol/L}$   $\text{KIO}_3$ ; (d) a+2 $\mu\text{mol/L}$   $\text{KIO}_3$ ; (e) a+2.5 $\mu\text{mol/L}$   $\text{KIO}_3$ ; (f) a+4 $\mu\text{mol/L}$   $\text{KIO}_3$ ; (g) a+4.5 $\mu\text{mol/L}$   $\text{KIO}_3$ ; (h) a+5 $\mu\text{mol/L}$   $\text{KIO}_3$ .

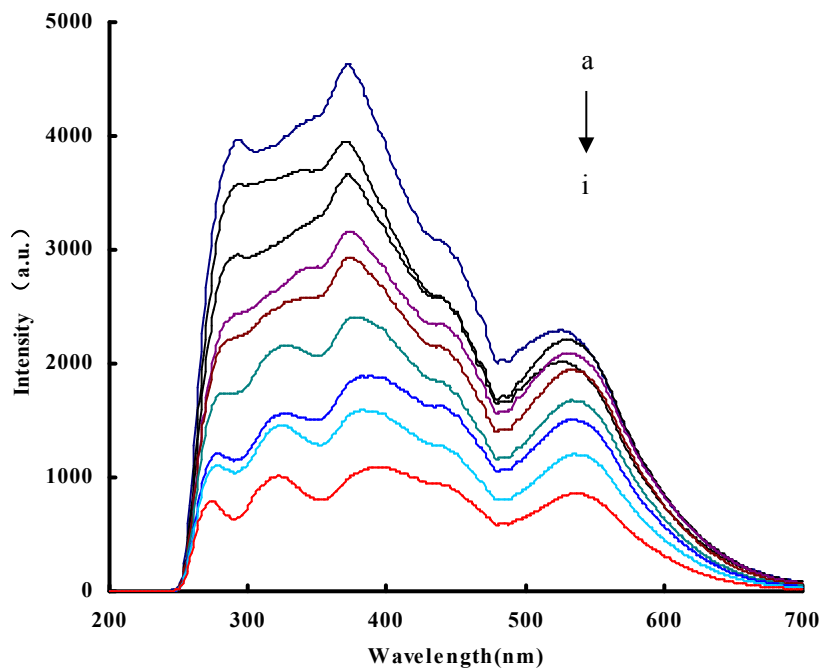

**Fig. 5S RRS of the GN-KI-H<sub>2</sub>O<sub>2</sub> system**

(a) pH 3.4 Na<sub>2</sub>HPO<sub>4</sub>-citric acid-3mmol/L KI-4.782μg/ml GN; (b) a+10μmol/L H<sub>2</sub>O<sub>2</sub>; (c) a+20μmol/L H<sub>2</sub>O<sub>2</sub>; (d) a+30μmol/L H<sub>2</sub>O<sub>2</sub>; (e) a+40μmol/L H<sub>2</sub>O<sub>2</sub>; (f) a+50μmol/L H<sub>2</sub>O<sub>2</sub>; (g) a+60μmol/L H<sub>2</sub>O<sub>2</sub>; (h) a+70μmol/L H<sub>2</sub>O<sub>2</sub>; (i) a+80μmol/L H<sub>2</sub>O<sub>2</sub>

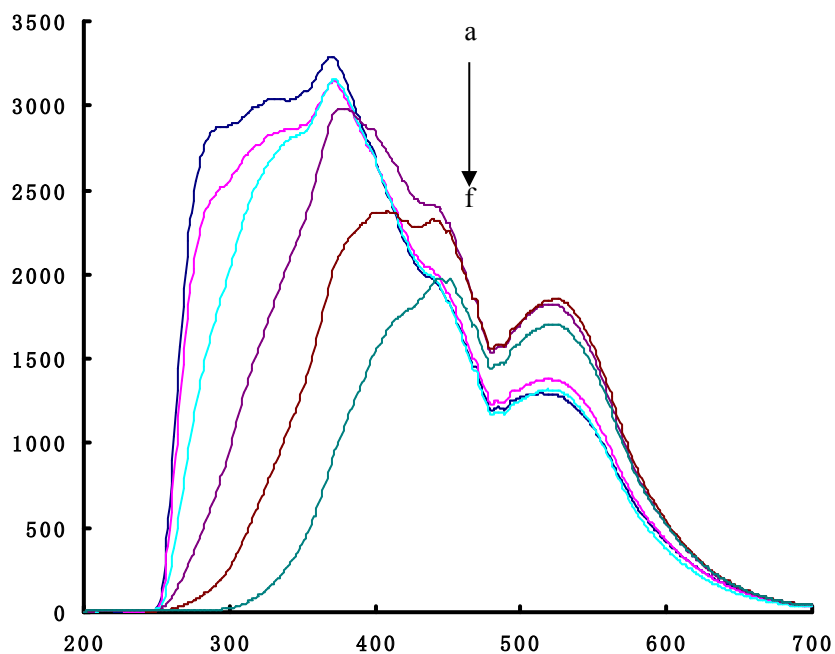

**Fig. 6S RRS of the GN-KI-H<sub>2</sub>O<sub>2</sub>-Fe<sup>3+</sup> catalytic system**

(a) pH 2.8 Na<sub>2</sub>HPO<sub>4</sub>- citric acid-4mmol/L KI-25mmol/L H<sub>2</sub>O<sub>2</sub>-Fe<sup>3+</sup>-4.782μg/ml GN; (b) a+0.025mmol/L Fe<sup>3+</sup>; (c) a+0.1mmol/L Fe<sup>3+</sup>; (d) a+0.25mmol/L Fe<sup>3+</sup>; (e) a+0.5mmol/L Fe<sup>3+</sup>; (f) a+1mmol/L Fe<sup>3+</sup>.

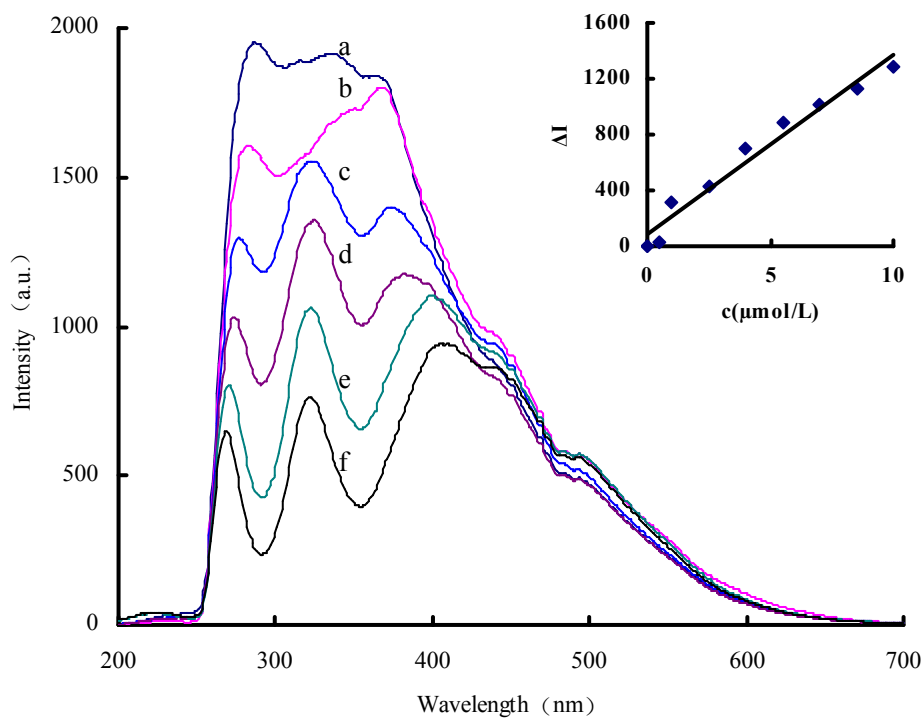

Fig. 7S RRS spectra of the GO-KI-KIO<sub>3</sub> system

(a) pH 2.8 Na<sub>2</sub>HPO<sub>4</sub>-citric acid-4mmol/L KI-15μg/L GO; (b) a+0.5μmol/L KIO<sub>3</sub>; (c) a+1μmol/L KIO<sub>3</sub>; (d) a+2.5μmol/L KIO<sub>3</sub>; (e) a+7μmol/L KIO<sub>3</sub>; (f) a+10μmol/L KIO<sub>3</sub>.

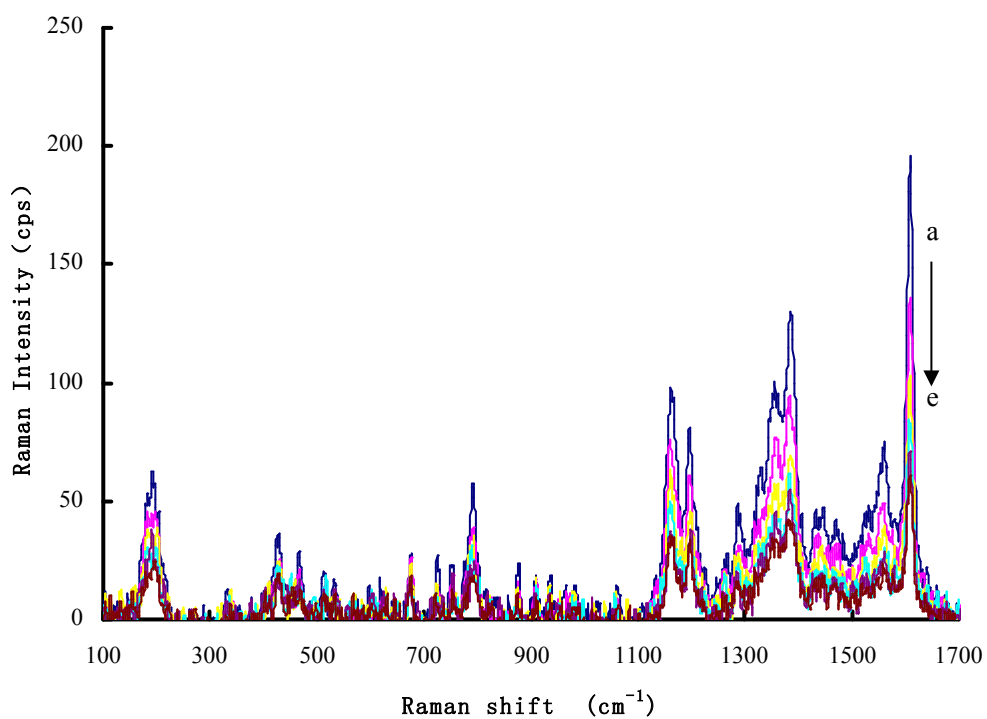

Fig. 8SA SERS spectra of KIO<sub>3</sub>-KI-GN system

a: pH 2.8Na<sub>2</sub>HPO<sub>4</sub>-citric acid-4mmol/L KI-1.0μmol/L VBB-12μg/mL GN; b:

a+1 $\mu$ mol/L KIO<sub>3</sub>; c: a+2.0 $\mu$ mol/L KIO<sub>3</sub>; d: a+3.0 $\mu$ mol/L KIO<sub>3</sub> ; e: a+4.0 $\mu$ mol/L KIO<sub>3</sub>.

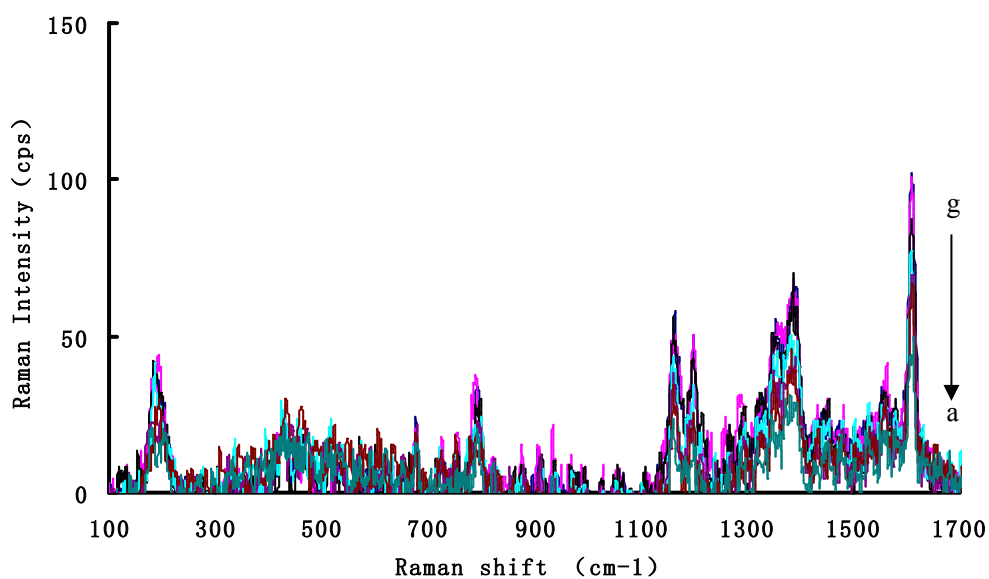

**Fig. 8SB SERS spectra of KIO<sub>3</sub>-KI-GO/GN system**

a: pH 2.8Na<sub>2</sub>HPO<sub>4</sub>-citric acid-4mmol/L KI-1.0 $\mu$ mol/L VBB-12 $\mu$ g/mL GO/GN; b: a+0.25 $\mu$ mol/L KIO<sub>3</sub>; c: a+0.5 $\mu$ mol/L KIO<sub>3</sub> ; d: a+1 $\mu$ mol/L KIO<sub>3</sub>; e: a+2.5 $\mu$ mol/L KIO<sub>3</sub>; f: a+4.0 $\mu$ mol/L KIO<sub>3</sub>; g: a+5.5 $\mu$ mol/L KIO<sub>3</sub>.

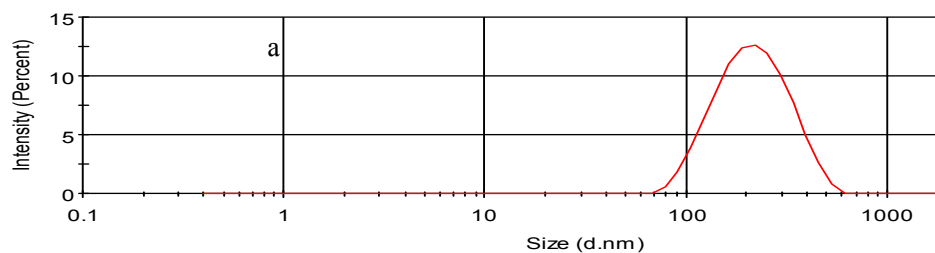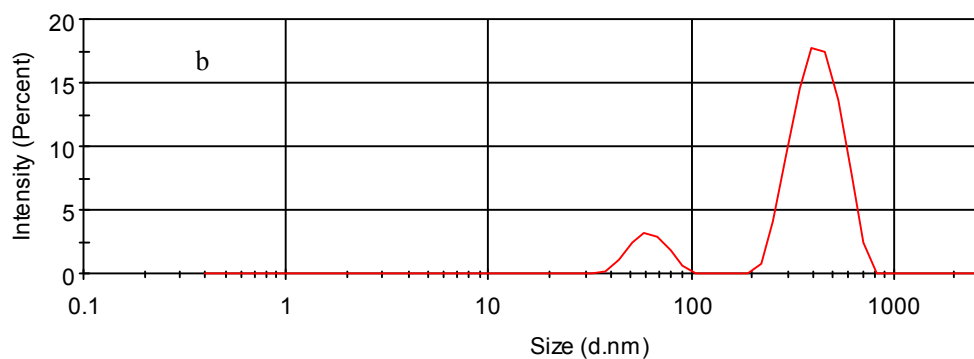

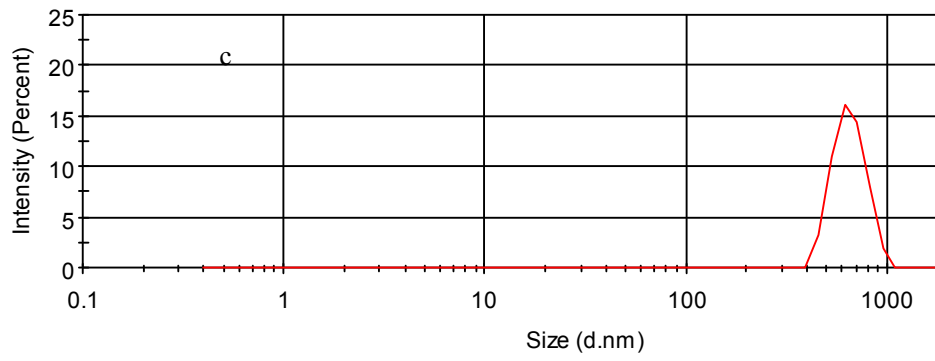

**Figure 9S Laser scattering graph of the NG/GO systems**

a: GO; b: GO/GN; c: GO/GN-2.8  $\text{Na}_2\text{HPO}_4$ -citric acid-4 mmol/L KI-2.5  $\mu\text{mol/L}$   $\text{KIO}_3$ .

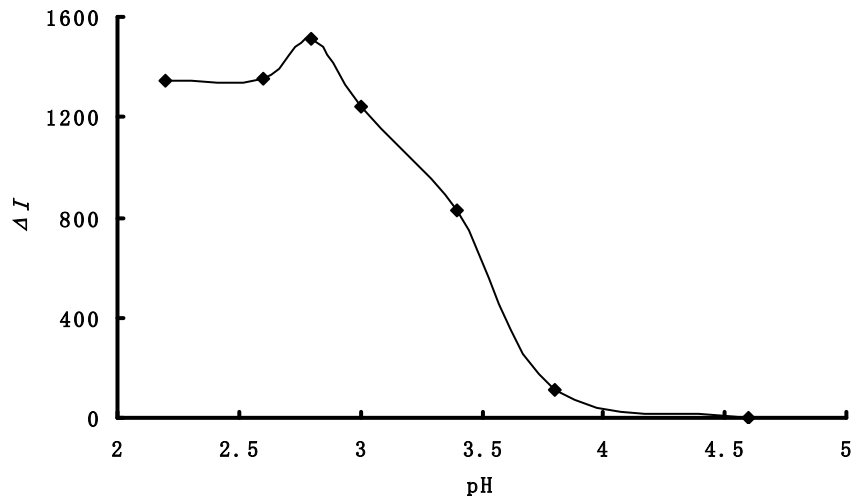

**Fig. 10S Effect of pH  $\text{Na}_2\text{HPO}_4$ -citric acid buffer**

3 mmol/L KI-2.5  $\mu\text{mol/L}$   $\text{KIO}_3$ -7.17  $\mu\text{g/mL}$  GN

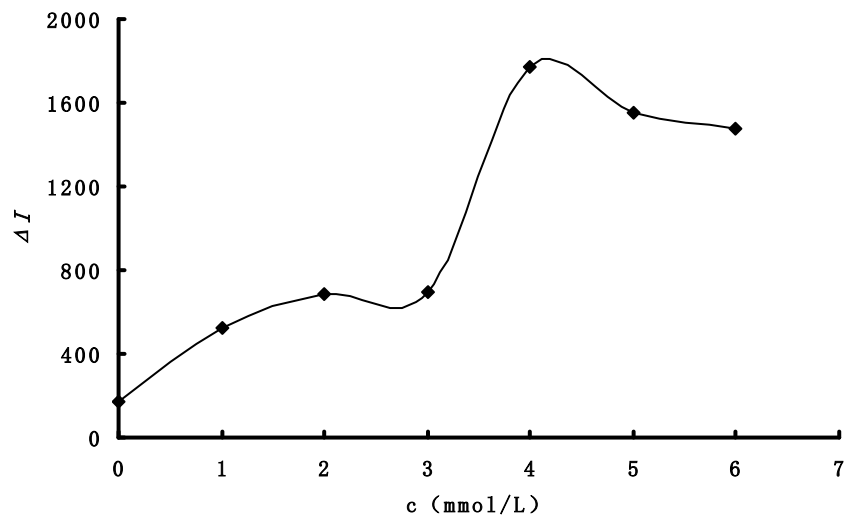

**Fig. 11S Effect of KI concentration**

pH 2.8  $\text{Na}_2\text{HPO}_4$ -citric acid buffer- $2.5\mu\text{mol/L KIO}_3$ - $7.173\mu\text{g/mL GN}$

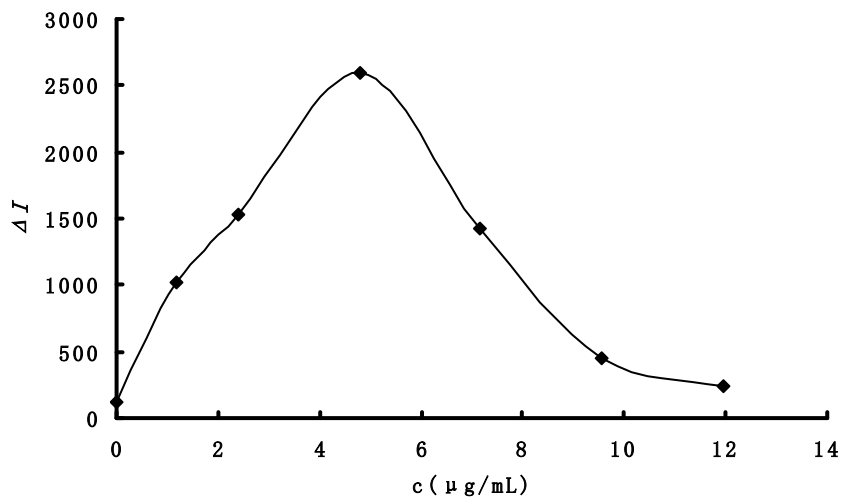

**Fig. 12S Effect of GN concentration**

pH 2.8  $\text{Na}_2\text{HPO}_4$ -citric acid buffer- $4\text{mmol/L KI}$ - $2.5\mu\text{mol/L KIO}_3$



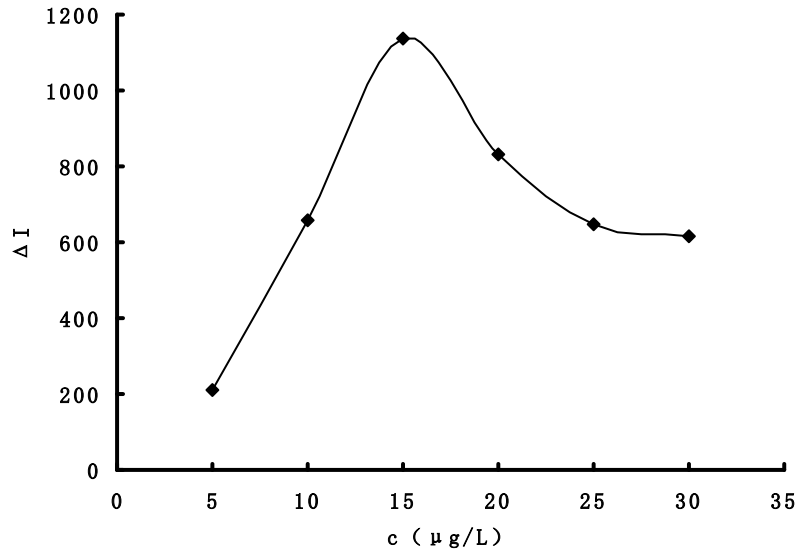

**Fig. 13S Effect of GO concentration**

pH 2.8Na<sub>2</sub>HPO<sub>4</sub>-citric acid buffer-4mmol/L KI-2.5μmol/L KIO<sub>3</sub>.

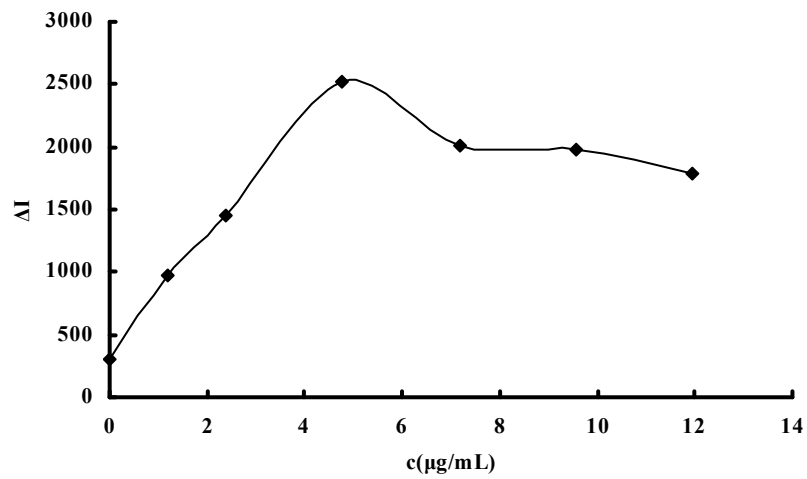

**Fig. 14S Effect of GO/GN concentration**

pH 2.8Na<sub>2</sub>HPO<sub>4</sub>-citric acid buffer-4mmol/L KI-2.5μmol/L KIO<sub>3</sub>

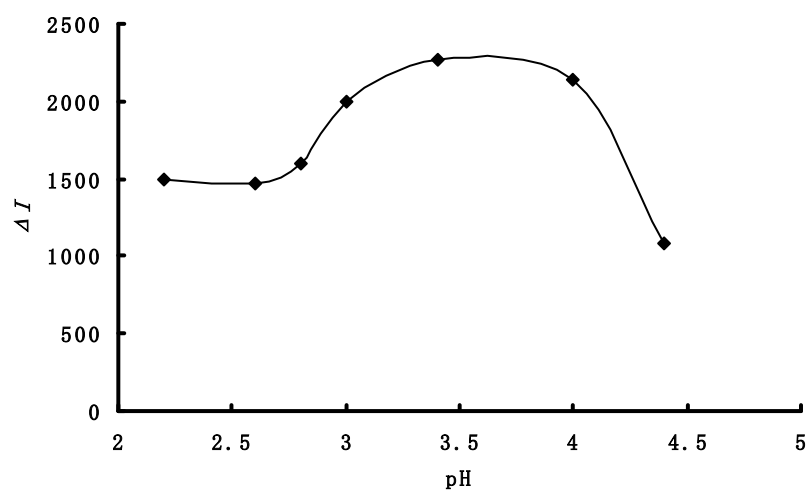

**Fig. 15S Effect of pH  $\text{Na}_2\text{HPO}_4$ -citric acid buffer**  
 3mmol/L KI-50 $\mu\text{mol/L}$   $\text{H}_2\text{O}_2$ -7.173  $\mu\text{g/mL}$  GN-50mmol/L NaCl

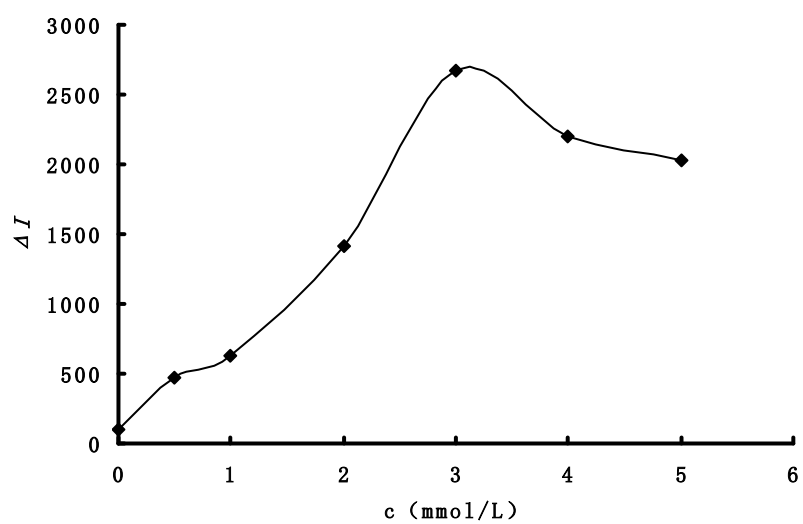

**Fig. 16S Effect of KI concentration**  
 pH3.4 $\text{Na}_2\text{HPO}_4$ -citric acid buffer-KI-50 $\mu\text{mol/L}$   $\text{H}_2\text{O}_2$ -7.173 $\mu\text{g/mL}$  GN-50mmol/L NaCl

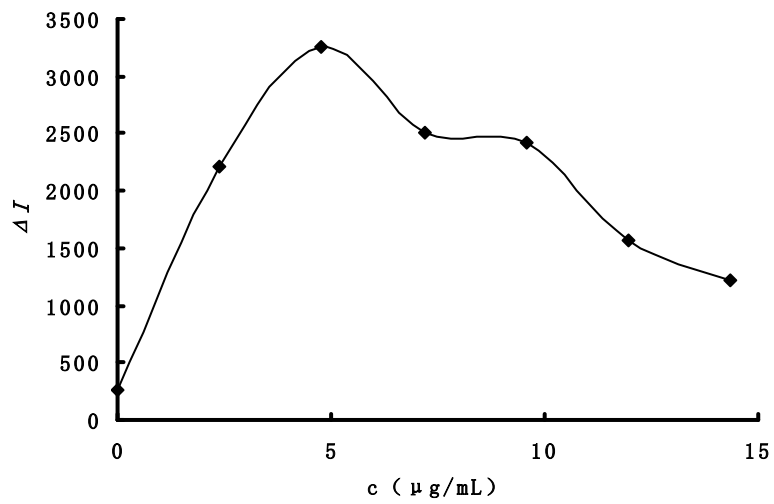

**Fig. 17S Effect of GN concentration**

pH 3.4 Na<sub>2</sub>HPO<sub>4</sub>-citric acid buffer-3 mmol/L KI-50 µmol/L H<sub>2</sub>O<sub>2</sub>- GN-50 mmol/L NaCl

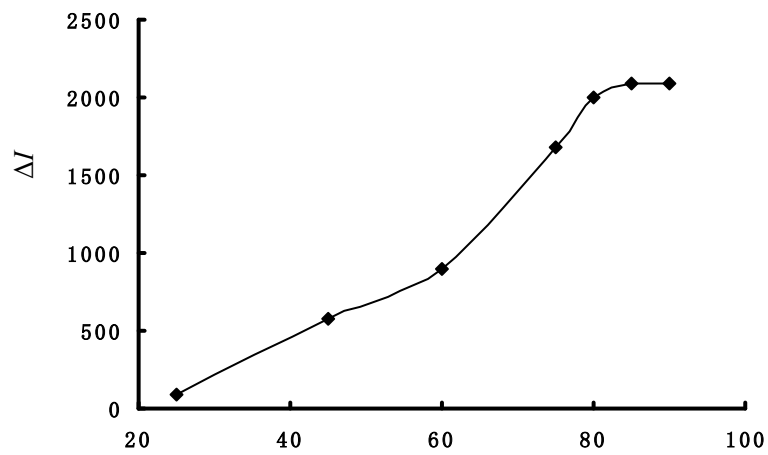

**Fig. 18S Effect of temperature**

pH 3.4 Na<sub>2</sub>HPO<sub>4</sub>-citric acid-3 mmol/L KI-50 µmol/L H<sub>2</sub>O<sub>2</sub>-4.782 µg/mL GN.

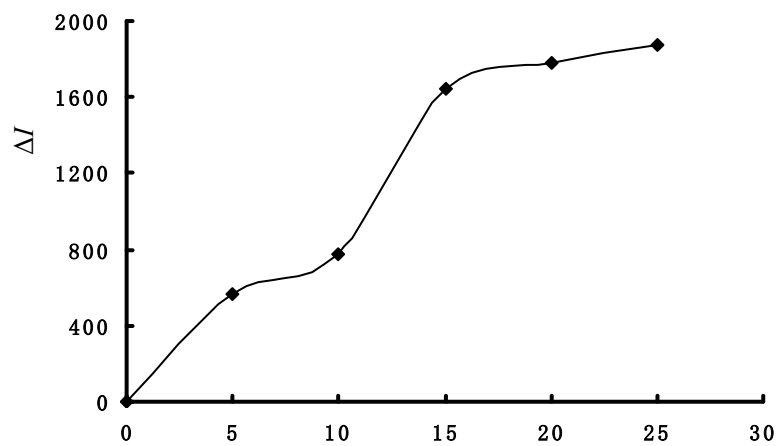

**Fig. 19S Effect of reaction time**pH 3.4 Na<sub>2</sub>HPO<sub>4</sub>-citric acid-3 mmol/L KI-50μmol/L H<sub>2</sub>O<sub>2</sub>-4.782μg/mL GN.**Table 1S** The reproducibility for some nanoparticle systems

| System                                                                         | Single value I           | Average RSD (%) |      |
|--------------------------------------------------------------------------------|--------------------------|-----------------|------|
| 4.78μg/ml GN                                                                   | 197,210,235,201,194      | 207             | 8.0  |
| pH 2.8 Na <sub>2</sub> HPO <sub>4</sub> -citric acid-4mmol/L KI-4.78μg/ml GN   | 4365,3918,3537,3343,3803 | 3793            | 10.3 |
| 15μg/L GO                                                                      | 810,887,875,800,823      | 839             | 4.7  |
| pH 2.8 Na <sub>2</sub> HPO <sub>4</sub> -citric acid-4mmol/L KI-15μg/L GO      | 906,900,872,917,869      | 893             | 2.4  |
| 4.78μg/mL GO/GN                                                                | 1394,1425,1282,1351,1492 | 1389            | 5.7  |
| pH 2.8 Na <sub>2</sub> HPO <sub>4</sub> -citric acid-4mmol/LKI-4.78μg/mL GO/GN | 1578,1727,1742,1607,1558 | 1642            | 5.2  |

Table 2S Comparison of the reported methods for I

| Method    | Principle                                                                                                                                                                                                                                                                     | LR (μmol/L)             | DL (μmol/L) | Comments                                                     | Ref. |
|-----------|-------------------------------------------------------------------------------------------------------------------------------------------------------------------------------------------------------------------------------------------------------------------------------|-------------------------|-------------|--------------------------------------------------------------|------|
| SM *      | Iodate reacts with iodide to form I <sub>3</sub> <sup>-</sup> that combined with starch to form blue complex with an absorption peak at 580 nm.                                                                                                                               | 1.6-7.0                 | 0.8         | Simple, but low sensitivity                                  | 37   |
| ISE       | Using standard addition method and iodine ISE, iodine ion in iodine fortified beverages were determined.                                                                                                                                                                      | 0.5-1.0×10 <sup>5</sup> | 0.63        | Simple and automatic, but low sensitivity                    | 38   |
| IC-ICP/MS | Alkaline extraction and IC-ICP/MS were applied as the sample pretreatment method and the detection technique respectively, for iodate and iodide determination.                                                                                                               | 0.002-7.9               | 0.0008      | Highly sensitive, but high-cost and complex.                 | 39   |
| Sensor    | The colorimetric iodide sensor was based on the anti-aggregation of GNs that relied upon the distance-dependent optical properties of GNs, the combination of mercapto-functionalized thymine on GNs, and the stronger affinity between I <sup>-</sup> and Hg <sup>2+</sup> . | 0.02-0.6                | 0.01        | Simple and sensitive, but Hg <sup>2+</sup> used and complex. | 33   |
| RRS       | Iodate reacts with iodide to form I <sub>3</sub> <sup>-</sup> that combined with rhodamine 6G to form ion-associated particles with a RRS peak at 400 nm.                                                                                                                     | 0.1-2.0                 | 0.03        | Simple, but low sensitivity                                  | 35   |

|        |                                                                                                                                 |         |       |                                 |            |
|--------|---------------------------------------------------------------------------------------------------------------------------------|---------|-------|---------------------------------|------------|
| RRS-ET | The SPRRS energy of GO/GNs transferred to $I_3^-$ complex that the decreased RRS intensity is linear to $IO_3^-$ concentration. | 0.025-5 | 0.008 | Simple, fast, highly sensitive. | This paper |
|--------|---------------------------------------------------------------------------------------------------------------------------------|---------|-------|---------------------------------|------------|

\* SM-spectrophotometric method, ISE-ion selective electrode, IC-ICP/MS-ion chromatography-inductively coupled plasma mass spectrometry.

**Table 3S Effect of foreign substances on the determination of iodide**

| Coexistent substance | Tolerance Concentration (μmol/L) | Relative error (%) | Coexistent substance           | Tolerance Concentration (μmol/L) | Relative error (%) |
|----------------------|----------------------------------|--------------------|--------------------------------|----------------------------------|--------------------|
| K <sup>+</sup>       | 250                              | 8.7                | Ni <sup>2+</sup>               | 250                              | 3.0                |
| Ca <sup>2+</sup>     | 250                              | 3.0                | MoO <sub>4</sub> <sup>2-</sup> | 200                              | -0.9               |
| Zn <sup>2+</sup>     | 250                              | 2.4                | SO <sub>4</sub> <sup>2-</sup>  | 250                              | -4.9               |
| Glucose              | 200                              | -6.1               | BrO <sub>3</sub> <sup>-</sup>  | 250                              | -2.0               |
| Co <sup>2+</sup>     | 250                              | -5.4               | Cu <sup>2+</sup>               | 200                              | 0.8                |
| Al <sup>3+</sup>     | 250                              | 1.8                | Mn <sup>2+</sup>               | 250                              | 7.5                |
| Ba <sup>2+</sup>     | 250                              | 1.6                | Cr <sup>3+</sup>               | 12.5                             | -7.1               |
| Mg <sup>2+</sup>     | 250                              | 1.1                | SeO <sub>3</sub> <sup>2-</sup> | 12.5                             | -5.4               |

**Table 4S Effect of foreign substances on the determination of H<sub>2</sub>O<sub>2</sub>**

| Coexistent substance | Tolerance Concentration (μmol/L) | Relative error (%) | Coexistent substance           | Tolerance Concentration (μmol/L) | Relative error (%) |
|----------------------|----------------------------------|--------------------|--------------------------------|----------------------------------|--------------------|
| K <sup>+</sup>       | 1000                             | 2.0                | Mg <sup>2+</sup>               | 1000                             | 0.7                |
| Ca <sup>2+</sup>     | 500                              | -8.9               | SeO <sub>3</sub> <sup>2-</sup> | 2000                             | 0.4                |
| Zn <sup>2+</sup>     | 1000                             | 1.4                | SO <sub>4</sub> <sup>2-</sup>  | 1000                             | 2.8                |
| Glucose              | 500                              | 2.4                | BrO <sub>3</sub> <sup>-</sup>  | 2500                             | 3.6                |
| BPO                  | 250                              | 6.1                | Cu <sup>2+</sup>               | 1000                             | 3.1                |
| Al <sup>3+</sup>     | 250                              | -7.8               | Mn <sup>2+</sup>               | 75                               | 8.6                |
| Ba <sup>2+</sup>     | 500                              | -8.7               | Cr <sup>3+</sup>               | 500                              | -7.6               |
